# Supplementary material for: What Are the Core Competencies of a Mental Health Nurse? Protocol for a Concept Mapping Study
Source: PubMed Central journal article supplement (PMC8608074; doi:10.3390/nursrep10020018), 2020-12-07
Supplement: nursrep-10-00018-s001.pdf [file nursrep-10-00018-s001.pdf]

**Supplementary File S1: The Good Reporting of A Mixed Methods Study (GRAMMS) checklist**

This checklist was adapted from O’Cathain, Murphy, Nicholl (15).

| <b>Guidelines</b>                                                                          | <b>Section: page</b>                                                                      |
|--------------------------------------------------------------------------------------------|-------------------------------------------------------------------------------------------|
| 1. Describe the justification for using a mixed-methods approach to the research question  | Material and methods – under why concept mapping<br>Page 3                                |
| 2. Describe the design in terms of the purpose, priority and sequence of methods           | Material and methods – under concept mapping and data collection procedure<br>Page 2 to 5 |
| 3. Describe each method in terms of sampling, data collection and analysis                 | Material and methods – under concept mapping and data collection procedure<br>Page 2 to 7 |
| 4. Describe where integration will occur, how it will occur and who will participate in it | Material and methods – concept mapping Page 2 & 7                                         |
| 5. Describe any limitation of one method associated with the presence of the other method  | Material and methods – concept mapping Page 3                                             |
| 6. Describe any insights gained from mixing or integrating methods                         | Conclusion- Page 8                                                                        |
